# Supplementary material
Source: Elsevier journal article supplement (https://comptes-rendus.academie-sciences.fr/chimie/article/10.1016/j.crci.2019.04.004/file/attach/mmc1.pdf)

# checkCIF/PLATON report

You have not supplied any structure factors. As a result the full set of tests cannot be run.

THIS REPORT IS FOR GUIDANCE ONLY. IF USED AS PART OF A REVIEW PROCEDURE FOR PUBLICATION, IT SHOULD NOT REPLACE THE EXPERTISE OF AN EXPERIENCED CRYSTALLOGRAPHIC REFEREE.

No syntax errors found.      CIF dictionary      Interpreting this report

## Datablock: compound\_1

---

Bond precision:    C-C = 0.0243 A                      Wavelength=0.71073

Cell:                      a=18.977(4)              b=14.282(3)              c=19.809(5)  
                            alpha=90              beta=90              gamma=90  
Temperature:              120 K

|                | Calculated                          | Reported                            |
|----------------|-------------------------------------|-------------------------------------|
| Volume         | 5369(2)                             | 5369(2)                             |
| Space group    | P b c a                             | P b c a                             |
| Hall group     | -P 2ac 2ab                          | -P 2ac 2ab                          |
| Moiety formula | C18 H14 Br4 Cu N6 O4 Re,<br>C2 H3 N | C18 H14 Br4 Cu N6 O4 Re,<br>C2 H3 N |
| Sum formula    | C20 H17 Br4 Cu N7 O4 Re             | C20 H17 Br4 Cu N7 O4 Re             |
| Mr             | 988.77                              | 988.79                              |
| Dx,g cm-3      | 2.447                               | 2.447                               |
| Z              | 8                                   | 8                                   |
| Mu (mm-1)      | 11.293                              | 11.293                              |
| F000           | 3696.0                              | 3696.0                              |
| F000'          | 3684.11                             |                                     |
| h,k,lmax       | 24,18,25                            | 24,18,25                            |
| Nref           | 6261                                | 6228                                |
| Tmin,Tmax      | 0.100,0.184                         | 0.165,0.498                         |
| Tmin'          | 0.008                               |                                     |

Correction method= # Reported T Limits: Tmin=0.165 Tmax=0.498  
AbsCorr = MULTI-SCAN

Data completeness= 0.995                      Theta(max)= 27.658

R(reflections)= 0.0831( 6003)              wR2(reflections)= 0.1966( 6228)

S = 1.415                      Npar= 334

---

The following ALERTS were generated. Each ALERT has the format

**test-name\_ALERT\_alert-type\_alert-level.**

Click on the hyperlinks for more details of the test.

---

**Alert level B**

PLAT342\_ALERT\_3\_B Low Bond Precision on C-C Bonds ..... 0.02429 Ang.  
PLAT780\_ALERT\_1\_B Coordinates do not Form a Properly Connected Set Please Do !

---

**Alert level C**

PLAT213\_ALERT\_2\_C Atom N1 has ADP max/min Ratio ..... 3.1 oblate  
PLAT213\_ALERT\_2\_C Atom C13 has ADP max/min Ratio ..... 3.7 prolat  
PLAT220\_ALERT\_2\_C Non-Solvent Resd 1 C Ueq(max)/Ueq(min) Range 4.3 Ratio  
PLAT234\_ALERT\_4\_C Large Hirshfeld Difference N2 --C10 . 0.17 Ang.  
PLAT241\_ALERT\_2\_C High 'MainMol' Ueq as Compared to Neighbors of C4 Check  
PLAT241\_ALERT\_2\_C High 'MainMol' Ueq as Compared to Neighbors of C5 Check  
PLAT241\_ALERT\_2\_C High 'MainMol' Ueq as Compared to Neighbors of C10 Check  
PLAT242\_ALERT\_2\_C Low 'MainMol' Ueq as Compared to Neighbors of C6 Check  
PLAT244\_ALERT\_4\_C Low 'Solvent' Ueq as Compared to Neighbors of C19 Check  
PLAT260\_ALERT\_2\_C Large Average Ueq of Residue Including N7 0.087 Check  
PLAT368\_ALERT\_2\_C Short C(sp2)-C(sp2) Bond C4 - C5 . 1.21 Ang.  
PLAT420\_ALERT\_2\_C D-H Without Acceptor N3 --H3A . Please Check

---

**Alert level G**

PLAT002\_ALERT\_2\_G Number of Distance or Angle Restraints on AtSite 2 Note  
PLAT003\_ALERT\_2\_G Number of Uiso or Uij Restrained non-H Atoms ... 4 Report  
PLAT004\_ALERT\_5\_G Polymeric Structure Found with Maximum Dimension 1 Info  
PLAT007\_ALERT\_5\_G Number of Unrefined Donor-H Atoms ..... 2 Report  
PLAT012\_ALERT\_1\_G N.O.K. \_shelx\_res\_checksum Found in CIF ..... Please Check  
PLAT083\_ALERT\_2\_G SHELXL Second Parameter in WGHT Unusually Large 372.83 Why ?  
PLAT172\_ALERT\_4\_G The CIF-Embedded .res File Contains DFIX Records 1 Report  
PLAT186\_ALERT\_4\_G The CIF-Embedded .res File Contains ISOR Records 1 Report  
PLAT344\_ALERT\_2\_G Unusual sp? Angle Range in Solvent/Ion for C19 Check  
PLAT860\_ALERT\_3\_G Number of Least-Squares Restraints ..... 25 Note

---

0 **ALERT level A** = Most likely a serious problem - resolve or explain  
2 **ALERT level B** = A potentially serious problem, consider carefully  
12 **ALERT level C** = Check. Ensure it is not caused by an omission or oversight  
10 **ALERT level G** = General information/check it is not something unexpected

2 ALERT type 1 CIF construction/syntax error, inconsistent or missing data  
14 ALERT type 2 Indicator that the structure model may be wrong or deficient  
2 ALERT type 3 Indicator that the structure quality may be low  
4 ALERT type 4 Improvement, methodology, query or suggestion  
2 ALERT type 5 Informative message, check

---

It is advisable to attempt to resolve as many as possible of the alerts in all categories. Often the minor alerts point to easily fixed oversights, errors and omissions in your CIF or refinement strategy, so attention to these fine details can be worthwhile. In order to resolve some of the more serious problems it may be necessary to carry out additional measurements or structure refinements. However, the purpose of your study may justify the reported deviations and the more serious of these should normally be commented upon in the discussion or experimental section of a paper or in the "special\_details" fields of the CIF. checkCIF was carefully designed to identify outliers and unusual parameters, but every test has its limitations and alerts that are not important in a particular case may appear. Conversely, the absence of alerts does not guarantee there are no aspects of the results needing attention. It is up to the individual to critically assess their own results and, if necessary, seek expert advice.

### **Publication of your CIF in IUCr journals**

A basic structural check has been run on your CIF. These basic checks will be run on all CIFs submitted for publication in IUCr journals (*Acta Crystallographica*, *Journal of Applied Crystallography*, *Journal of Synchrotron Radiation*); however, if you intend to submit to *Acta Crystallographica Section C* or *E* or *IUCrData*, you should make sure that full publication checks are run on the final version of your CIF prior to submission.

### **Publication of your CIF in other journals**

Please refer to the *Notes for Authors* of the relevant journal for any special instructions relating to CIF submission.

---

**PLATON version of 13/12/2018; check.def file version of 11/12/2018**

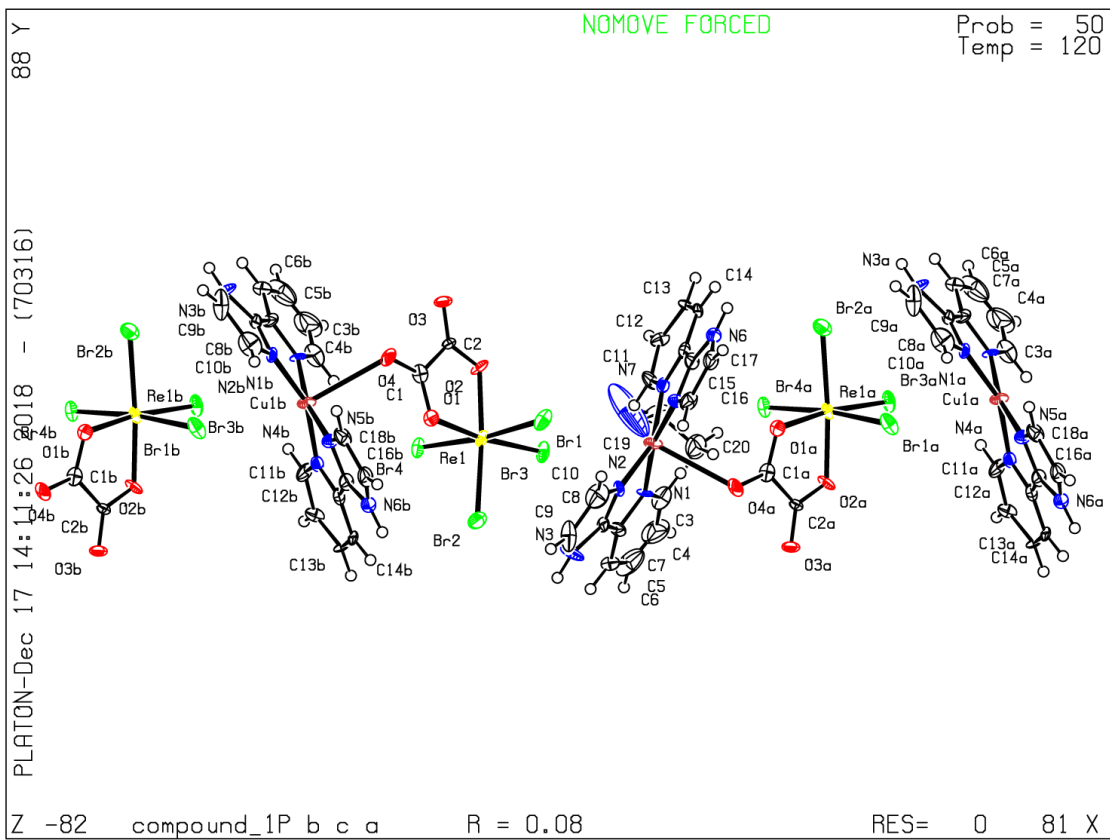

Supplement: mmc1 [file mmc1.pdf]
